# Supplementary material for: Abnormal IGF-Binding Protein Profile in the Bone Marrow of Multiple Myeloma Patients
Source: PubMed Central journal article supplement (PMC4844248; doi:10.1371/journal.pone.0154256), 2016-04-25
Supplement: pone.0154256.s001.pdf [file pone.0154256.s001.pdf]

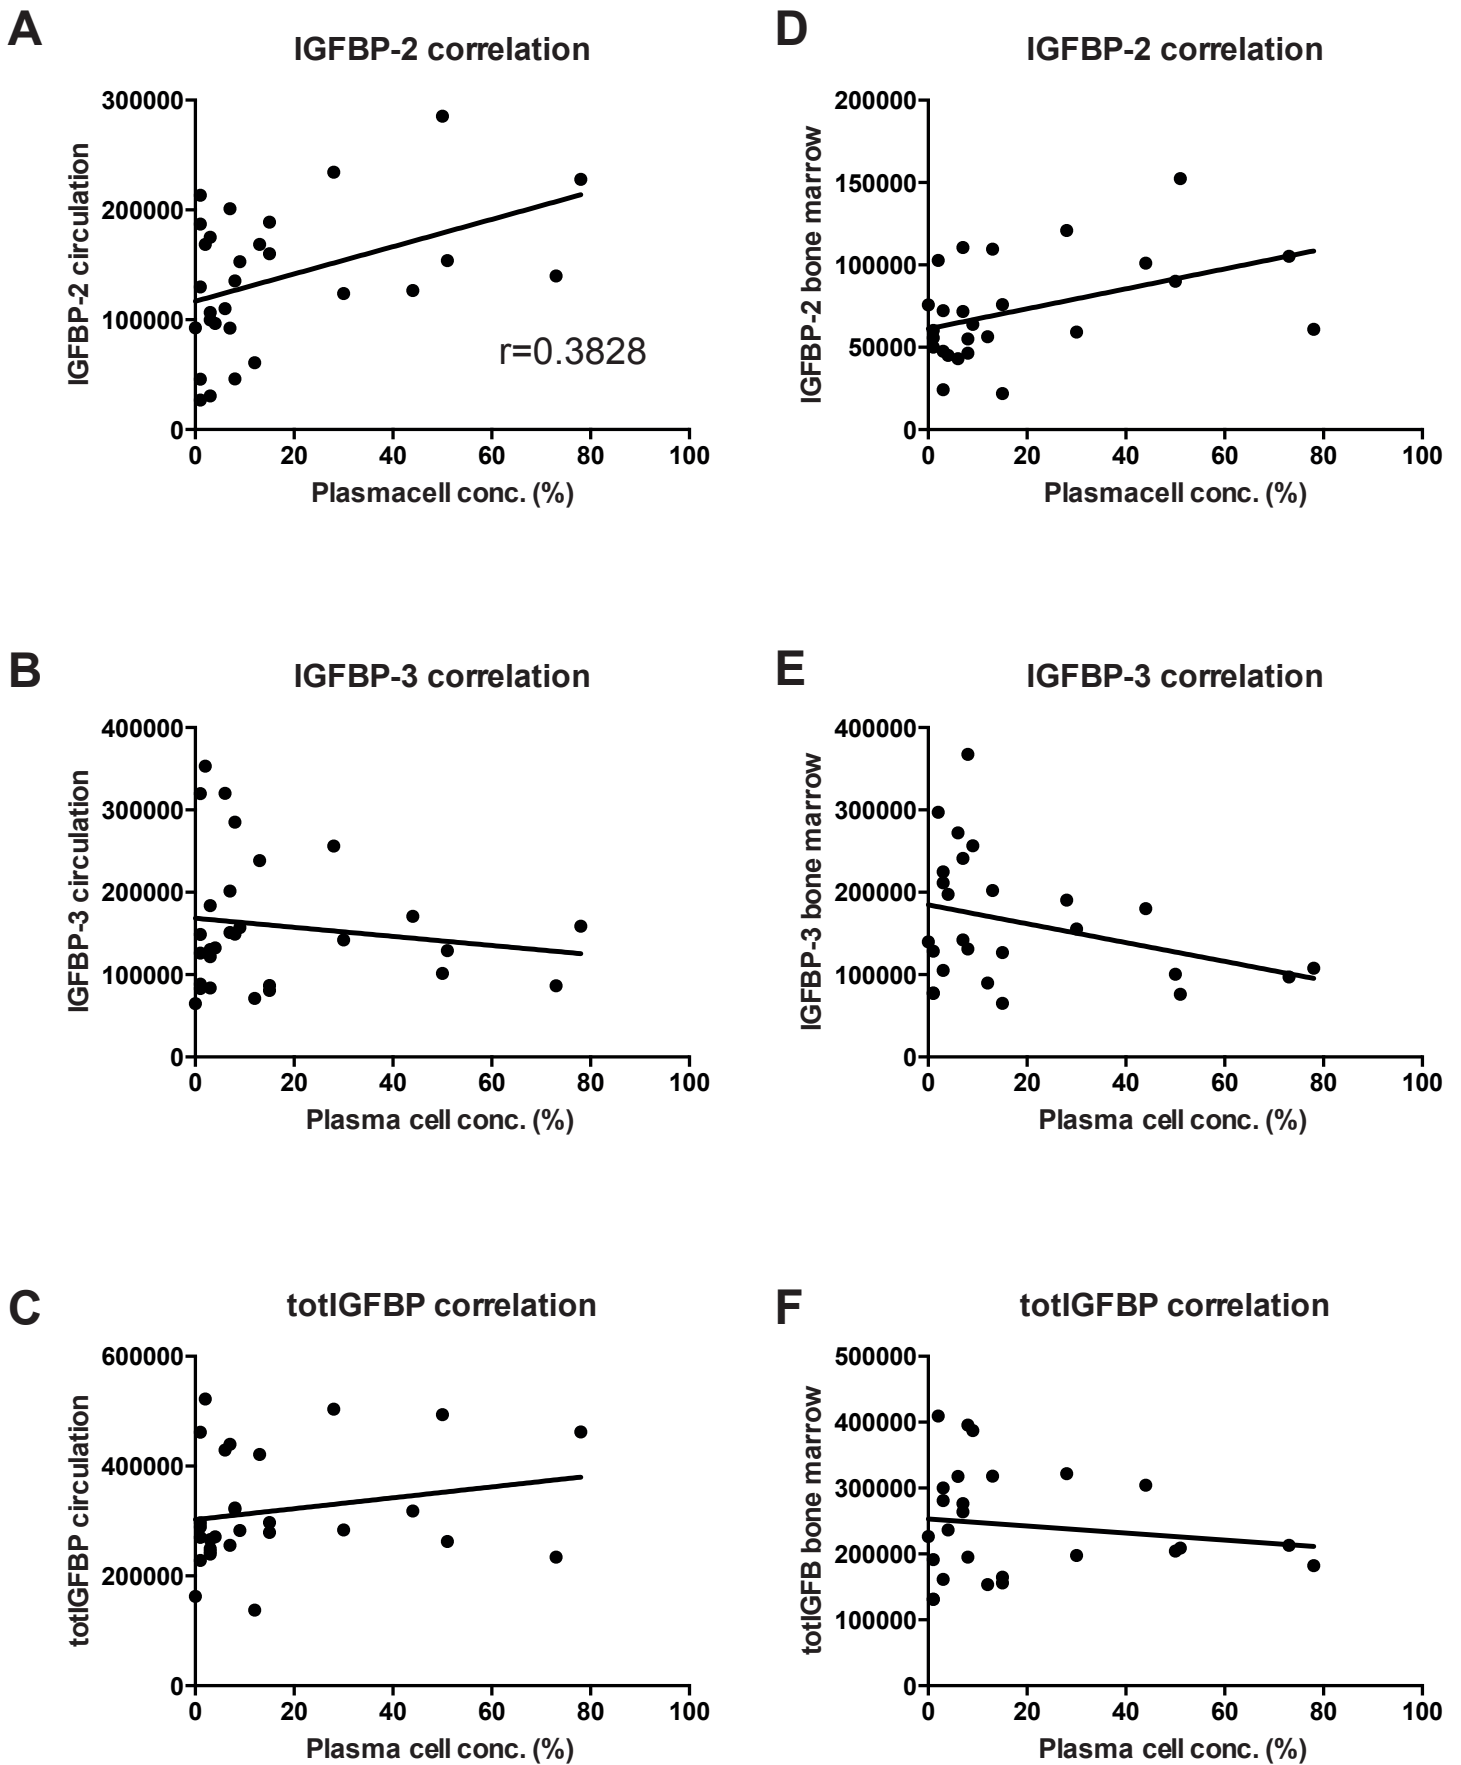

**S1 Fig. Correlation analysis of IGFBP levels and plasma cell infiltration.**

The degree of plasma cell infiltration was plotted against the level of IGFBP-2 (A, D), IGFBP-3 (B, E) and total IGFBP (C, F) in plasma from the circulation (A, B, C) and bone marrow (D, E, F).

Non-parametric correlation analysis only identified a significant correlation for circulating IGFBP-2 levels and plasma cell infiltration ( $p < 0.05$ ). Dots represent individual patients. (r) Spearman's correlation coefficient.
